# Supplementary material for: CXCR3 Expression and Genome-Wide 3′ Splice Site Selection in the TCGA Breast Cancer Cohort
Source: Life (Basel). 2021 Jul 26;11(8):746. doi: 10.3390/life11080746 (PMC8398780; doi:10.3390/life11080746)
Supplement: Supplementary file 1 [file life-11-00746-s001.zip › life-1288481-supplementary.pdf]

# Supplementary Material of CXCR3 Expression and Genome-Wide 3' Splice Site Selection in the TCGA Breast Cancer Cohort

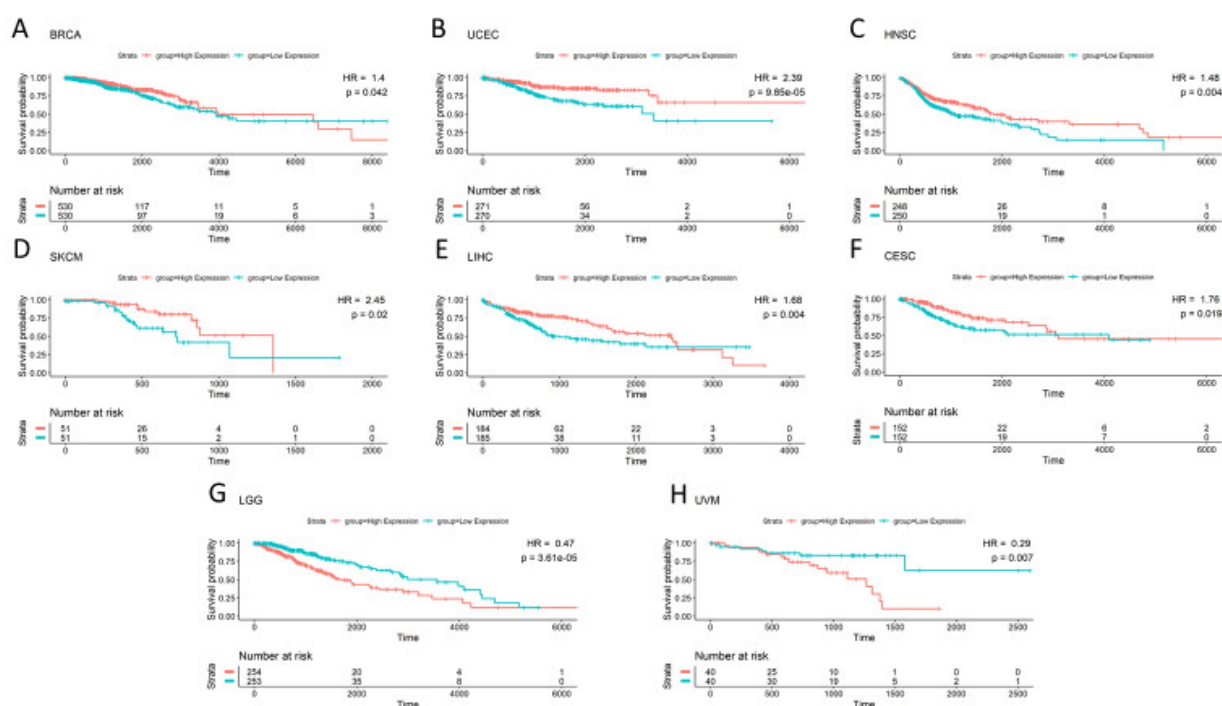

**Figure S1.** Significant survival correlations with CXCR3 gene expression. Kaplan–Meier survival curves of patients split at median CXCR3 expression into 2 groups, low (blue) and high (red). Top two rows (A–F) show cohorts where high CXCR3 expression was correlated with better survival (Cox proportional analysis,  $p$ -value  $< 0.05$ , HR  $> 1$ ). Bottom row (G,H) shows cohorts where low CXCR3 expression was correlated with better survival (Cox proportional analysis,  $p$ -value  $< 0.05$ , HR  $< 1$ ).

**Table S1.** Pan-Cancer CXCR3 Splicing Results.

| Cohort | Cox Survival P-value | Unpaired Tumor vs. Normal P-value |
|--------|----------------------|-----------------------------------|
| BRCA   | 0.64                 | Not Enough Samples                |
| OV     | 0.54                 | Not Enough Samples                |
| LUAD   | 0.81                 | Not Enough Samples                |
| KIRC   | 0.79                 | Not Enough Samples                |
| HNSC   | 0.83                 | Not Enough Samples                |
| THCA   | 0.085                | 1                                 |
| LUSC   | 0.09                 | 0.948768785                       |
| SKCM   | 0.84                 | Not Enough Samples                |
| COAD   | 0.99                 | 0.809655052                       |
| STAD   | 0.43                 | Not Enough Samples                |
| BLCA   | 0.63                 | Not Enough Samples                |
| CECSC  | 0.62                 | Not Enough Samples                |
| SARC   | 0.32                 | Not Enough Samples                |
| PAAD   | 0.95                 | Not Enough Samples                |

|      |      |                    |
|------|------|--------------------|
| READ | 0.4  | Not Enough Samples |
| TGCT | 0.19 | Not Enough Samples |
| THYM | 0.67 | Not Enough Samples |
| MESO | 0.14 | Not Enough Samples |
| DLBC | 0.42 | Not Enough Samples |

Not Enough Samples for Survival: <5 tumor samples following filtering (sum of  $\geq 20$  reads across both junctions). Not Enough Samples for Tumor vs. Normal: <5 tumor sample and <5 normal samples following filtering (sum of  $\geq 20$  reads across both junctions). Cancers that are absent in table did not have enough samples for either analysis.

**Table S2.** Pan-Cancer CXCR3 Gene Expression Results.

| Cohort | Cox Survival<br>P-Value | Tumor vs. Normal<br>P-value |
|--------|-------------------------|-----------------------------|
| BRCA   | 0.04                    | <0.0001                     |
| GBM    | 0.53                    | Not Enough Samples          |
| OV     | 0.25                    | NA                          |
| LUAD   | 0.5                     | 0.395                       |
| UCEC   | < 0.0001                | 0.482                       |
| KIRC   | 0.076                   | 0.000                       |
| HNSC   | 0.004                   | 0.507                       |
| LGG    | < 0.0001                | Not Enough Samples          |
| THCA   | 0.75                    | 0.693                       |
| LUSC   | 0.76                    | 0.0001                      |
| PRAD   | 0.82                    | 0.938                       |
| SKCM   | 0.017                   | Not Enough Samples          |
| COAD   | 0.88                    | 0.898                       |
| STAD   | 0.5                     | 0.006                       |
| BLCA   | 0.45                    | 0.258                       |
| LIHC   | 0.0034                  | 0.862                       |
| CESC   | 0.018                   | Not Enough Samples          |
| KIRP   | 0.92                    | 0.034                       |
| SARC   | 0.0036                  | Not Enough Samples          |
| ESCA   | 0.67                    | 0.078                       |
| PAAD   | 0.96                    | Not Enough Samples          |
| PCPG   | 0.4                     | NA                          |
| READ   | 0.2                     | 0.250                       |
| TGCT   | 0.78                    | Not Enough Samples          |
| THYM   | 0.058                   | Not Enough Samples          |
| KICH   | 0.82                    | 0.092                       |
| ACC    | 0.41                    | Not Enough Samples          |
| MESO   | 0.18                    | Not Enough Samples          |
| UVM    | 0.004                   | Not Enough Samples          |
| DLBC   | 0.54                    | Not Enough Samples          |
| UCS    | 0.49                    | Not Enough Samples          |
| CHOL   | 0.31                    | 0.820                       |
